# Supplementary material for: Ligamentum teres reconstruction using autogenous semitendinosus tendon with toggle technique in rabbits
Source: PeerJ. 2023 Mar 23;11:e14777. doi: 10.7717/peerj.14777 (PMC10040178; doi:10.7717/peerj.14777)
Supplement: Supplemental Information 3 — Values in Group 1 and Group 2. [file peerj-11-14777-s003.xlsx]

## Sheet: Planilha1
	Body mass (Kg)
Rabbit 1	2.6
Rabbit 2	2.4
Rabbit 3	1.5
Rabbit 4	2.2
Rabbit 5	1.3
Rabbit 6	2.1
Rabbit 7	1.8
Rabbit 8	1.6
Rabbit 9	2.1
Rabbit 10	2.3
Rabbit 11	2.3
Rabbit 12	2.1
Rabbit 13	1.6
	1.99231	0.394676
Rabbit 14	2.45
Rabbit 15	2.57
Rabbit 16	2.5
Rabbit 17	2.35
Rabbit 18	2.9
Rabbit 19	1.9
Rabbit 20	2
Rabbit 21	2.7
Rabbit 22	2.2
Rabbit 23	1.6
Rabbit 24	1.63
Rabbit 25	2.45
Rabbit 26	2.13
	2.26	0.39659
