# Supplementary material for: Ligamentum teres reconstruction using autogenous semitendinosus tendon with toggle technique in rabbits
Source: PeerJ journal article supplement (doi:10.7717/peerj.14777), 2023-03-23
Supplement: Supplemental_File_1.pdf [file Supplemental_File_1.pdf]

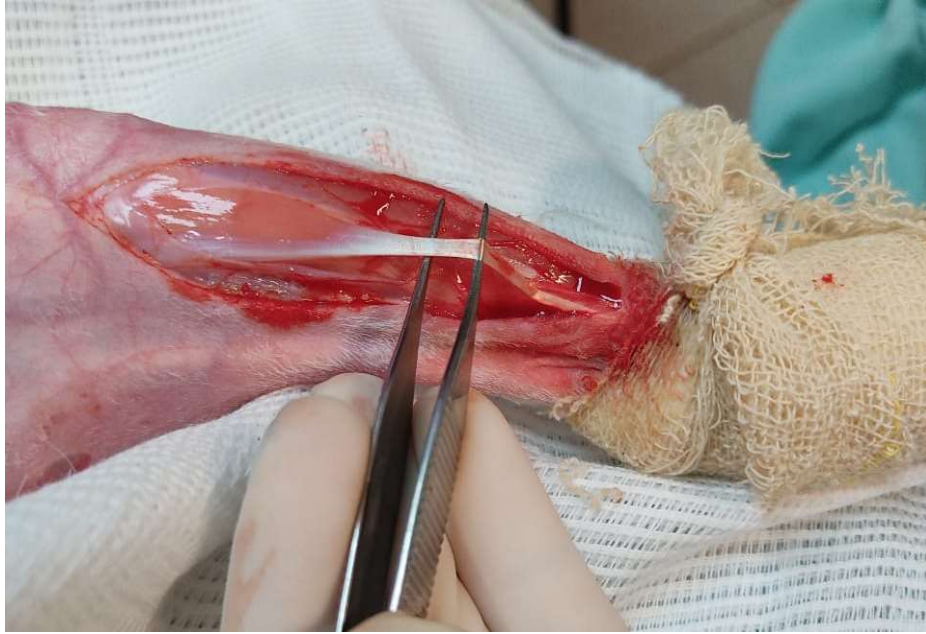

Exposition of the semitendinosus tendon for harvesting

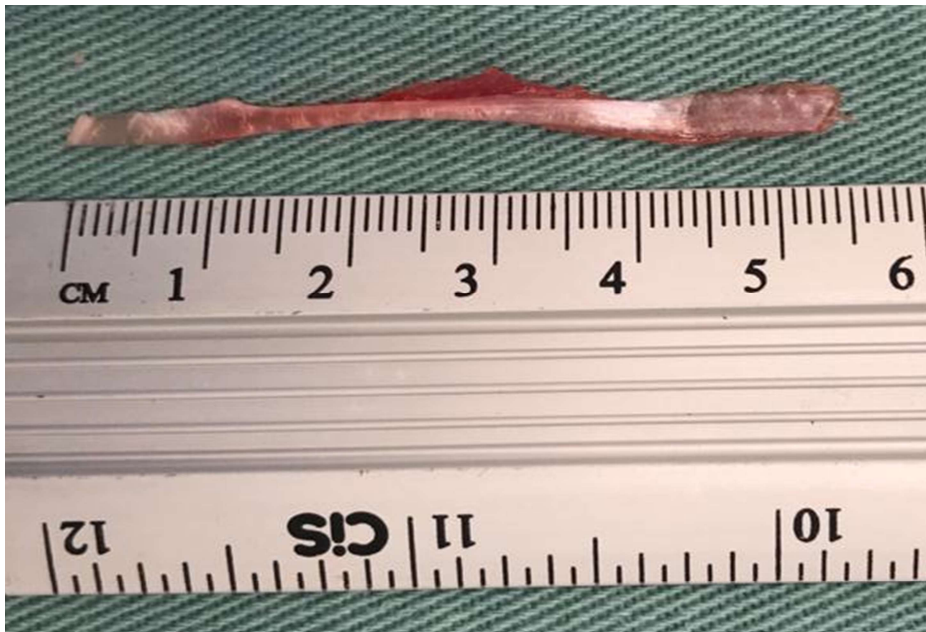

The length of semitendinosus tendon graft after harvesting.
