# Supplementary material for: Ligamentum teres reconstruction using autogenous semitendinosus tendon with toggle technique in rabbits
Source: PeerJ journal article supplement (doi:10.7717/peerj.14777), 2023-03-23
Supplement: Supplemental_File_2.pdf [file Supplemental_File_2.pdf]

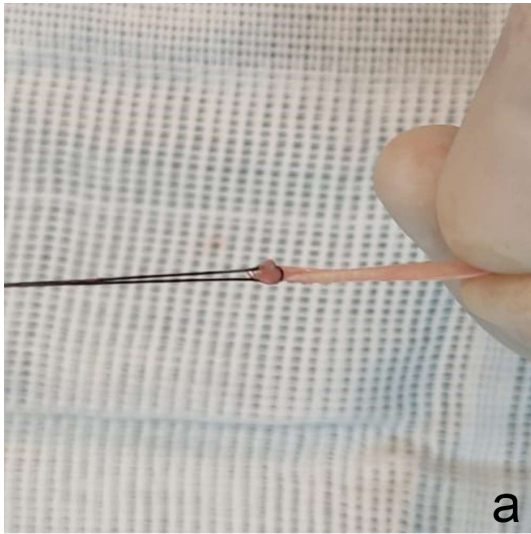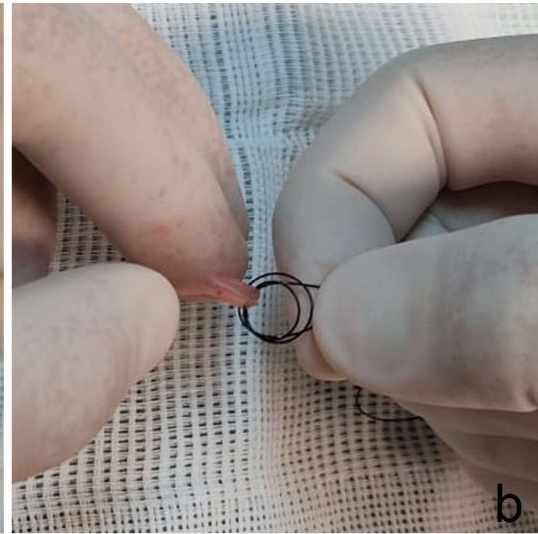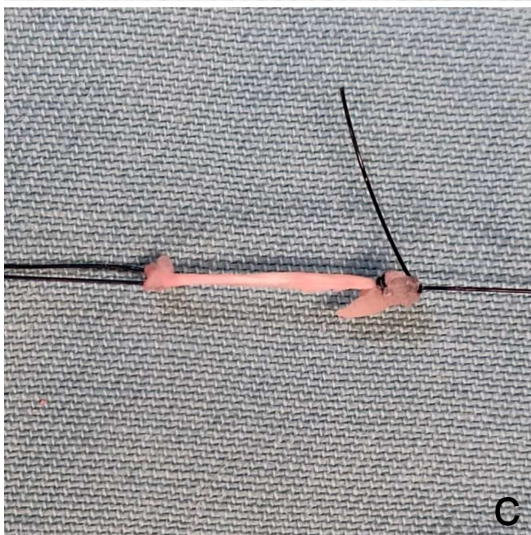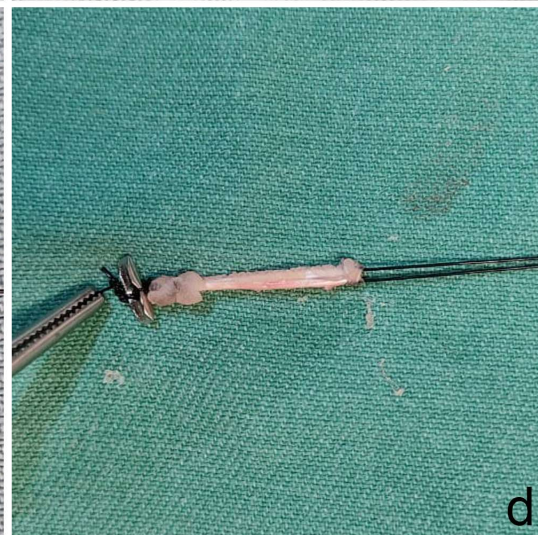

Preparation of semitendinosus tendon graft using a double-bundle technique.
